# Supplementary material for: Electrochemical synthesis of polyaniline–Ni–Co hybrid structures on titanium substrates for ultrahigh-capacitance supercapacitor electrodes
Source: Royal Society of Chemistry journal article supplement (doi:10.1039/d5ra08977h), 2026-01-01
Supplement: d5ra08977h1.pdf [file d5ra08977h1.pdf]

## SUPPORTING INFORMATION

### **Electrochemical Synthesis of Polyaniline-Ni-Co Hybrid Structures on Titanium Substrates for Ultrahigh-Capacitance Supercapacitor Electrodes**

Abdullah Wasif <sup>a,c</sup>, Md Humayun Kabir<sup>b\*</sup>, Md. Ershad Halim<sup>c</sup>, Md. Sanwar Hossain<sup>a</sup>, Fatema Tuz  
Zohora<sup>a,c</sup>, Sabina Yasmin<sup>a\*</sup>

<sup>a</sup>Institute of National Analytical Research and Service (INARS), Bangladesh Council of Scientific and  
Industrial Research (BCSIR), Dhanmondi, Dhaka-1205, Bangladesh

<sup>b</sup>Institute of Food Science and Technology (IFST), Bangladesh Council of Scientific and Industrial  
Research (BCSIR), Dhanmondi, Dhaka-1205, Bangladesh

<sup>c</sup>Department of Chemistry, University of Dhaka, Dhaka-1000, Bangladesh

\*Corresponding author e-mail: *sabinayasmin@bcsir.gov.bd*

\*Corresponding author e-mail: *humayunkabir@bcsir.gov.bd*

### S1. Equivalent thickness estimation from gravimetric mass loading

The coating thickness was estimated as an *equivalent average thickness* using the gravimetric areal mass loading ( $\Gamma$ ) and an assumed film density ( $\rho$ ), according to:

$$t_{eq} = \frac{\Gamma}{\rho} \quad (1)$$

where  $t_{eq}$  is the equivalent thickness (cm),  $\Gamma$  is the areal mass loading  $\text{g cm}^{-2}$ , and  $\rho$  is the density  $\text{mg cm}^{-3}$ . Using the experimentally determined values  $\Gamma_{\text{Ni-Co}}=0.102 \text{ mg cm}^{-2}$  and  $\Gamma_{\text{PANI}}=0.128 \text{ mg cm}^{-2}$ , the corresponding equivalent thicknesses were calculated as:

$$t_{eq, \text{Ni-Co}} = \frac{0.102 \times 10^{-3}}{\rho_{\text{Ni-Co}}}$$
$$t_{eq, \text{PANI}} = \frac{0.128 \times 10^{-3}}{\rho_{\text{PANI}}}$$

The Ni-Co alloy density was estimated as  $\rho_{\text{Ni-Co}} \sim 8.9 \text{ g cm}^{-3}$ <sup>1</sup> and the PANI density was estimated as  $\rho_{\text{PANI}} \sim 1.33 \text{ g cm}^{-3}$ <sup>2</sup>. Based on these values, the thickness of the layers was 0.12  $\mu\text{m}$  and 0.96  $\mu\text{m}$ , respectively. However, these values represent equivalent thicknesses; the true physical thickness can differ due to film porosity/roughness.

Table S1: XRD peak integrated areas for the PANI–Ni–Co/Ti sheet, including the PANI amorphous halo reflection (Ti substrate and Ni–Co underlayer peaks identified for comparison from PANI crystallinity analysis).

| 2 $\theta$ | FWHM    | Integrated Area | Peak Type | Peak Assignment |
|------------|---------|-----------------|-----------|-----------------|
| 25.79      | 1.69328 | 892.9937        | Broad     | PANI Layer      |
| 35.39      | 0.52486 | 1204.06152      | Sharp     | Ti Substrate    |
| 38.76      | 0.42208 | 3684.73521      | Sharp     | Ti Substrate    |
| 40.48      | 0.42813 | 5238.63495      | Sharp     | Ti Substrate    |
| 43.18      | 0.2121  | 605.30439       | Sharp     | Ni-Co Layer     |
| 53.27      | 0.49147 | 1230.95516      | Sharp     | Ti Substrate    |
| 63.25      | 0.62423 | 556.26526       | Sharp     | Ti Substrate    |
| 70.91      | 0.55859 | 1877.0921       | Sharp     | Ti Substrate    |
| 76.49      | 0.58853 | 837.4645        | Sharp     | Ti Substrate    |
| 77.64      | 0.82764 | 434.21259       | Sharp     | Ti Substrate    |

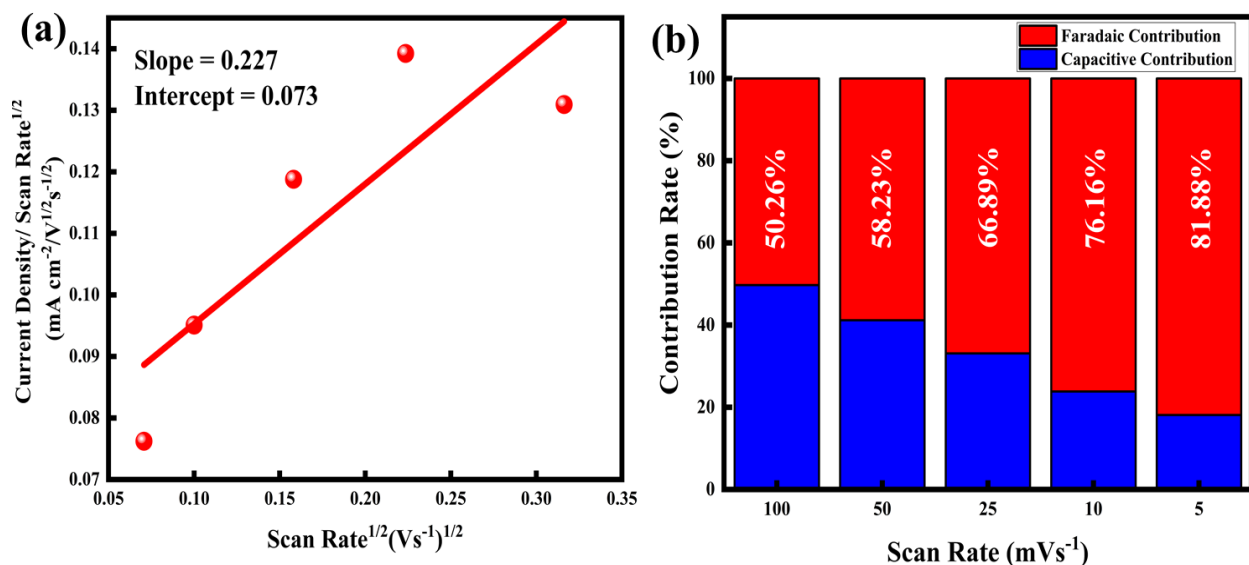

Figure S1: Quantification of capacitive and faradaic (diffusion-controlled) charge-storage contributions of the PANI-Ni-Co/Ti electrode; (a) linear fit of  $i/v^{1/2}$  versus  $v^{1/2}$  (Dunn method) at a fixed potential (0.6V); (b) comparison of capacitive and faradaic contribution percentages at scan rates of 5–100 mV s<sup>-1</sup>.

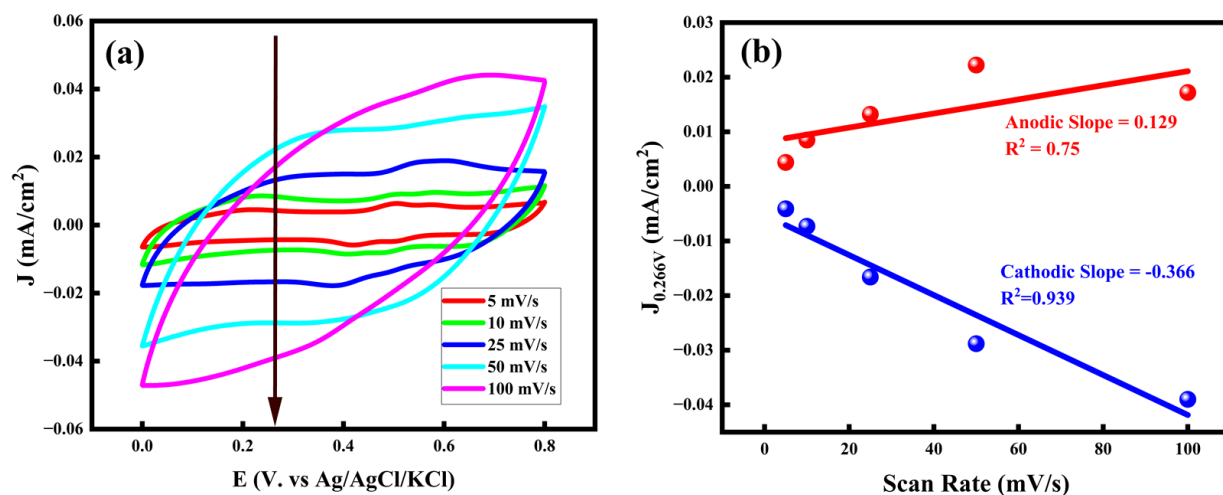

Figure S2: (a) CVs of the PANI-Ni-Co/Ti electrode recorded in a non-faradaic potential region at different scan rates; (b) Corresponding double layer capacitance ( $C_{dl}$ ) derived from CV curves.

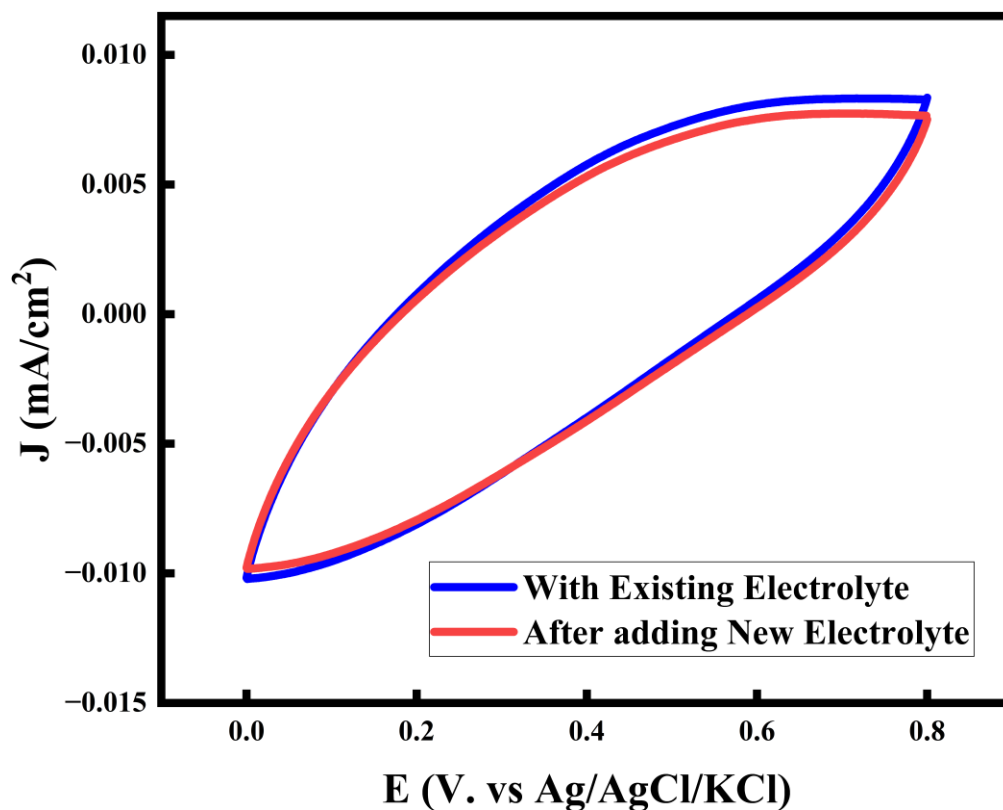

Figure S3: Post-cycling CV curves of the PANI-Ni-Co/Ti electrode recorded at  $50 \text{ mV s}^{-1}$  in  $1.0 \text{ M H}_2\text{SO}_4$  ( $0.0\text{--}0.8 \text{ V vs Ag/AgCl}$ ) using the existing electrolyte and after replacement with fresh electrolyte, showing largely preserved CV profiles after the 1000-cycle stability test.

#### References

- 1 P. Barbu, M. M. Codescu, M. Iordoc, V. Marinescu, E. Manta, C. Ilie and M. Popa, *Rev. Chim.*, 2018, **69**, 1355–1362.
- 2 J.-W. Jeon, S. R. Kwon and J. L. Lutkenhaus, *J. Mater. Chem. A*, 2015, **3**, 3757–3767.
